# Supplementary material for: Natural volcanic CO2 seeps reveal future trajectories for host–microbial associations in corals and sponges
Source: PubMed Central journal article supplement — ISME J. 2014 Oct 17;9(4):894–908. doi: 10.1038/ismej.2014.188 (PMC4817704; doi:10.1038/ismej.2014.188), 2014-10-17
Supplement: ismej2014188x1.pdf [file ismej2014188x1.pdf]

A.

KEGG Pathway (Level 2)

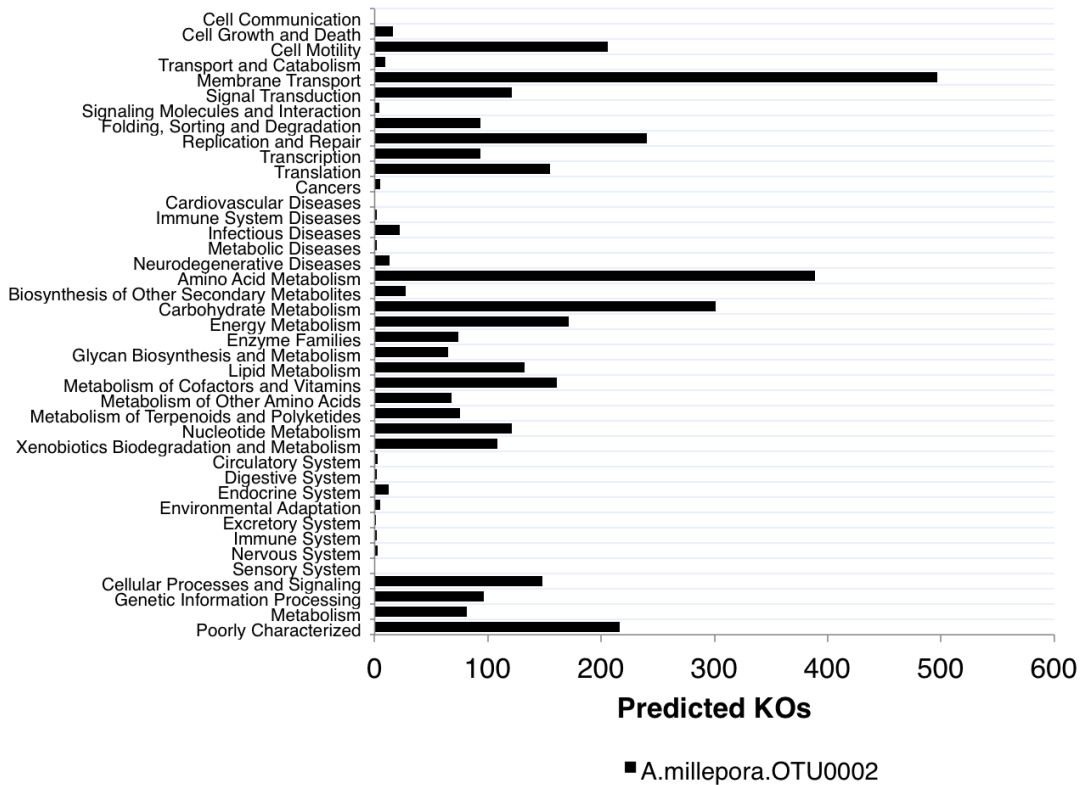

B.

KEGG Pathway (Level 2)

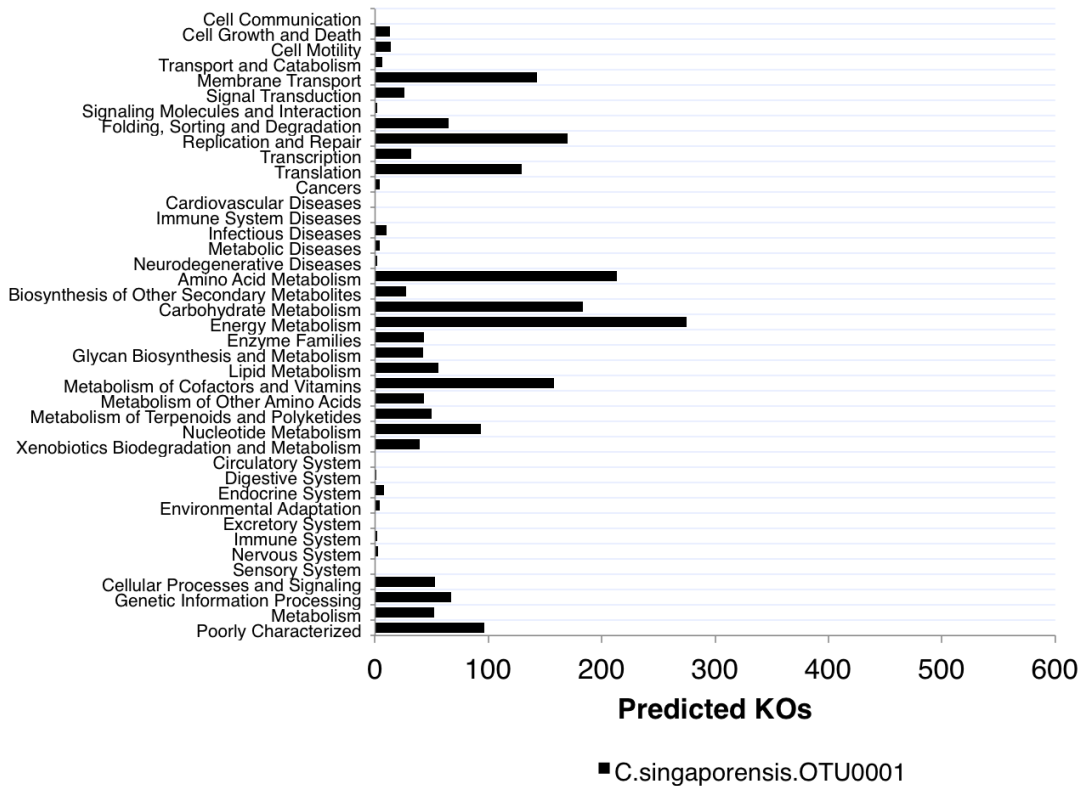

**Supplemental Figure 1.** Predicted functional profiles of two symbionts. Bars show predicted relative abundances of KEGG pathways in each OTU based on sequenced relatives generated using the PICRUSt software (Methods). (A) Functional profile of *Endozoicomonas*. (B) Functional profile of *Synechococcus*. Note that only genes in KEGG Orthology groups can be predicted using this method; most genomes will contain a substantial proportion of orphan genes lacking orthologs and for which no functional predictions can be made.
